# Supplementary material
Source: publisher site journal article supplement (https://www.spandidos-publications.com/6268/downloadSupplementary)
Supplement: Supplementary file 1 [file downloadSupplementary]

## Sheet: Table 1
Table SI. Genes associated with NLRX1 expression in GSE53625
Query	Gene	cor	pvalue
NLRX1	LYPD3	0.584303	8.98585e-18
NLRX1	AIM1L	0.570233	7.94894e-17
NLRX1	KLC3	0.546172	2.62229e-15
NLRX1	LINC01749	0.519006	9.84462e-14
NLRX1	AHI1	-0.506816	4.52237e-13
NLRX1	TUBA3C	0.534534	1.28972e-14
NLRX1	ZDHHC17	-0.543291	3.9124e-15
NLRX1	PHLDB3	0.569695	8.6229e-17
NLRX1	EVPLL	0.549861	1.56223e-15
NLRX1	GJB3	0.511355	2.58164e-13
NLRX1	FAM151A	0.565324	1.6603e-16
NLRX1	GPR45	0.63298	1.97816e-21
NLRX1	KRT75	0.529909	2.38867e-14
NLRX1	PI3	0.618873	2.64197e-20
NLRX1	MIR210HG	0.691038	9.62487e-27
NLRX1	PPM1J	0.534612	1.27626e-14
NLRX1	PPL	0.559143	4.12444e-16
NLRX1	FGFR1	-0.518918	9.95521e-14
NLRX1	OVOL1	0.563158	2.28858e-16
NLRX1	ARHGAP27	0.656886	1.77988e-23
NLRX1	OSGIN1	0.524943	4.58141e-14
NLRX1	SLC27A4	0.569946	8.30206e-17
NLRX1	CASC15	-0.506176	4.89088e-13
NLRX1	TUBA4A	0.555916	6.58434e-16
NLRX1	FAM83A-AS1	0.501163	8.98659e-13
NLRX1	KRT16	0.608263	1.70551e-19
NLRX1	TNNT2	0.503456	6.81247e-13
NLRX1	CCDC153	0.505876	5.074e-13
NLRX1	ADNP	-0.546315	2.57034e-15
NLRX1	KLK11	0.551396	1.25691e-15
NLRX1	S100A8	0.528362	2.9293e-14
NLRX1	SMAGP	0.506628	4.62745e-13
NLRX1	ZNF287	-0.570157	8.04169e-17
NLRX1	LIFR	-0.537206	8.99513e-15
NLRX1	TMPRSS11D	0.565086	1.71997e-16
NLRX1	PCDH1	0.509856	3.10951e-13
NLRX1	OSTF1	0.525659	4.17343e-14
NLRX1	GBP6	0.524876	4.62175e-14
NLRX1	PRSS3	0.532249	1.75091e-14
NLRX1	ZNF80	0.565775	1.55229e-16
NLRX1	P2RX3	0.510631	2.82441e-13
NLRX1	LYNX1	0.549421	1.66222e-15
NLRX1	LY6G6C	0.550164	1.49676e-15
NLRX1	SPRR2A	0.510625	2.82659e-13
NLRX1	ALMS1	-0.62853	4.54503e-21
NLRX1	COA5	-0.522241	6.50121e-14
NLRX1	BAIAP2	0.538992	7.05685e-15
NLRX1	RDH13	0.520329	8.3124e-14
NLRX1	SLC39A2	0.517598	1.17768e-13
NLRX1	PLD2	0.57075	7.35097e-17
NLRX1	RALB	0.5404	5.82271e-15
NLRX1	PIKFYVE	-0.542714	4.2368e-15
NLRX1	TDRD12	0.513011	2.09949e-13
NLRX1	SLC5A10	0.545085	3.05084e-15
NLRX1	ABI2	-0.568665	1.0071e-16
NLRX1	DSG3	0.59038	3.39137e-18
NLRX1	SLPI	0.576142	3.22272e-17
NLRX1	TMPRSS11F	0.541974	4.69162e-15
NLRX1	RNF222	0.574358	4.24093e-17
NLRX1	CLIC3	0.519004	9.84659e-14
NLRX1	LINC00520	0.546242	2.59692e-15
NLRX1	ANO10	0.505132	5.55651e-13
NLRX1	SPRR1B	0.650822	6.11965e-23
NLRX1	MNS1	-0.504155	6.25834e-13
NLRX1	KRT6A	0.58752	5.3783e-18
NLRX1	SLC15A1	0.517109	1.25306e-13
NLRX1	CERS4	0.551636	1.2149e-15
NLRX1	KLK12	0.509554	3.22793e-13
NLRX1	FAM13B	-0.518113	1.10303e-13
NLRX1	DSG1-AS1	0.590214	3.48377e-18
NLRX1	GIPC1	0.618041	3.06558e-20
NLRX1	USP51	-0.53363	1.45598e-14
NLRX1	LYPLA1	0.532079	1.79099e-14
NLRX1	RABGGTA	0.716826	1.5837e-29
NLRX1	PLIN3	0.547524	2.17036e-15
NLRX1	DLG1-AS1	0.500182	1.01117e-12
NLRX1	CARD18	0.529117	2.65204e-14
NLRX1	PIM1	0.523025	5.87523e-14
NLRX1	ACY1	0.538321	7.73216e-15
NLRX1	KCNK1	0.52284	6.01781e-14
NLRX1	SLC37A2	0.525909	4.03973e-14
NLRX1	BCL10	0.55769	5.09504e-16
NLRX1	MALL	0.603348	3.95213e-19
NLRX1	KLK9	0.607811	1.8435e-19
NLRX1	ZNF750	0.597792	1.00454e-18
NLRX1	GM2A	0.508846	3.52274e-13
NLRX1	NIPAL4	0.565764	1.55492e-16
NLRX1	EPS8L2	0.512655	2.19504e-13
NLRX1	ALOXE3	0.527764	3.1688e-14
NLRX1	KCNG2	0.563545	2.16146e-16
NLRX1	TIGD5	0.53831	7.74418e-15
NLRX1	BNIPL	0.568349	1.05612e-16
NLRX1	S100A12	0.597671	1.0249e-18
NLRX1	PHC1	-0.515481	1.53943e-13
NLRX1	HMOX2	0.630043	3.43021e-21
NLRX1	LINC00528	0.518829	1.00697e-13
NLRX1	MAP3K9	0.539666	6.43749e-15
NLRX1	NUDT18	0.579389	1.9471e-17
NLRX1	ZNF22	-0.50043	9.81512e-13
NLRX1	JHDM1D-AS1	0.5124	2.26634e-13
NLRX1	ZCCHC6	0.514392	1.76566e-13
NLRX1	FGFBP1	0.519495	9.24833e-14
NLRX1	RNH1	0.518349	1.07046e-13
NLRX1	SPRR2D	0.501024	9.1381e-13
NLRX1	SLC10A6	0.552937	1.00934e-15
NLRX1	PLA2G4E-AS1	0.542848	4.15881e-15
NLRX1	C2orf27A	-0.515283	1.57845e-13
NLRX1	MAFG	0.527867	3.12616e-14
NLRX1	TOM1	0.570787	7.30943e-17
NLRX1	ALS2CL	0.585927	6.94e-18
NLRX1	REXO2	0.518842	1.0052e-13
NLRX1	SLC10A3	0.539972	6.17357e-15
NLRX1	KLK10	0.633598	1.76034e-21
NLRX1	IL36G	0.558759	4.36208e-16
NLRX1	HES5	0.515793	1.48003e-13
NLRX1	SBSN	0.592609	2.35976e-18
NLRX1	TGM1	0.656765	1.825e-23
NLRX1	MPZL2	0.604612	3.18837e-19
NLRX1	CARHSP1	0.515389	1.55752e-13
NLRX1	IZUMO4	0.549827	1.56981e-15
NLRX1	TRIM8	-0.507254	4.28542e-13
NLRX1	SMCO2	0.503217	7.01288e-13
NLRX1	PLA2G4E	0.566735	1.34517e-16
NLRX1	GRHL3	0.636304	1.05312e-21
NLRX1	CDK5R1	0.520092	8.56885e-14
NLRX1	TNFAIP1	0.557491	5.2437e-16
NLRX1	SNX33	0.528235	2.97848e-14
NLRX1	LMTK3	0.608363	1.67616e-19
NLRX1	CNFN	0.551684	1.20654e-15
NLRX1	IL20RB	0.528518	2.86984e-14
NLRX1	EPS8L1	0.583485	1.02308e-17
NLRX1	LOC100128573	0.581724	1.35065e-17
NLRX1	SLURP1	0.514211	1.80627e-13
NLRX1	TNK1	0.513263	2.03436e-13
NLRX1	RHOV	0.51665	1.32805e-13
NLRX1	ACAP3	0.513804	1.9011e-13
NLRX1	CALB2	0.505591	5.2538e-13
NLRX1	LTB4R2	0.556915	5.69974e-16
NLRX1	ANKRD9	0.581821	1.33025e-17
NLRX1	SH3GL1	0.608173	1.732e-19
NLRX1	SQRDL	0.634017	1.62631e-21
NLRX1	GSDMC	0.602754	4.37065e-19
NLRX1	SV2A	-0.504102	6.29875e-13
NLRX1	BLVRB	0.512166	2.3335e-13
NLRX1	VSIG10L	0.514846	1.66779e-13
NLRX1	SDR9C7	0.563794	2.08322e-16
NLRX1	GJB5	0.502616	7.54174e-13
NLRX1	ALOX12B	0.550567	1.41378e-15
NLRX1	EPN3	0.507597	4.10875e-13
NLRX1	TMEM40	0.625154	8.46801e-21
NLRX1	CLEC18B	0.576046	3.27109e-17
NLRX1	SH3PXD2A-AS1	0.617919	3.13331e-20
NLRX1	EGLN3	0.535005	1.21061e-14
NLRX1	ASPRV1	0.500747	9.44858e-13
NLRX1	S100A9	0.50586	5.08352e-13
NLRX1	BDH1	0.531547	1.92231e-14
NLRX1	SIRT7	0.58474	8.38438e-18
NLRX1	SPRR1A	0.612139	8.69914e-20
NLRX1	TINCR	0.538165	7.89788e-15
NLRX1	KCNK7	0.553785	8.94171e-16
NLRX1	TCTN2	-0.501212	8.93363e-13
NLRX1	ATP6V1D	0.589563	3.8702e-18
NLRX1	WDR55	0.531192	2.01523e-14
NLRX1	LAD1	0.597112	1.12466e-18
NLRX1	GOLGA7B	0.508385	3.72897e-13
NLRX1	CDH16	0.564081	1.99663e-16
NLRX1	PGM2	0.52585	4.07074e-14
NLRX1	S100A2	0.523308	5.66408e-14
NLRX1	HGS	0.518879	1.00058e-13
NLRX1	NSDHL	0.56322	2.26802e-16
NLRX1	PCAT6	0.533261	1.52958e-14
NLRX1	FAM162A	0.521332	7.30851e-14
NLRX1	KRT6C	0.569889	8.37393e-17
NLRX1	MDC1	-0.511552	2.51897e-13
NLRX1	IL36RN	0.590995	3.06914e-18
NLRX1	COMTD1	0.511155	2.64644e-13
NLRX1	DMKN	0.589695	3.78897e-18
NLRX1	FAM25A	0.597367	1.07799e-18
NLRX1	PRRG4	0.54877	1.82202e-15
NLRX1	APOD	-0.516207	1.40464e-13
NLRX1	ZNF512	-0.516854	1.29418e-13
